# Supplementary material for: B3S2 monolayer as an anode material for Na/K-ion batteries: a first-principles study
Source: Royal Society of Chemistry journal article supplement (doi:10.1039/d3cp01372c), 2023-01-01
Supplement: d3cp01372c1.pdf [file d3cp01372c1.pdf]

## **B<sub>3</sub>S<sub>2</sub> monolayer as an anode material for Na/K-ion batteries: a first-principles study**

Danhong Wang,<sup>a</sup> Zhifang Yang,<sup>a</sup> Wenliang Li,<sup>\*a</sup> Jingping Zhang<sup>\*a</sup>

### **Table of contents**

|                                                                                                                                                                                                   |    |
|---------------------------------------------------------------------------------------------------------------------------------------------------------------------------------------------------|----|
| Fig. S1. The phonon dispersion of B <sub>3</sub> S <sub>2</sub> monolayer using a (2x2x1) cell.                                                                                                   | P1 |
| Fig. S2. (a) Electronic band structure and (b) DOS of B <sub>3</sub> S <sub>2</sub> monolayer using a (2x2x1) cell.                                                                               | P1 |
| Fig. S3. Electronic band structures and DOSs of B <sub>3</sub> S <sub>2</sub> monolayer after the adsorption of Li, Na, and K atoms.                                                              | P2 |
| Fig. S4. Top and side views of geometric structures for Li adsorption on the B <sub>3</sub> S <sub>2</sub> monolayer.                                                                             | P3 |
| Fig. S5. The lattice constant variation as the function of Na and K concentration x: (a) Na <sub>x</sub> B <sub>3</sub> S <sub>2</sub> , (b) K <sub>x</sub> B <sub>3</sub> S <sub>2</sub> .       | P3 |
| Fig. S6. Snapshots of (a) Na <sub>6</sub> B <sub>3</sub> S <sub>2</sub> and (b) K <sub>2</sub> B <sub>3</sub> S <sub>2</sub> equilibrium structures at 300 K at the end of 2 ps AIMD simulations. | P4 |

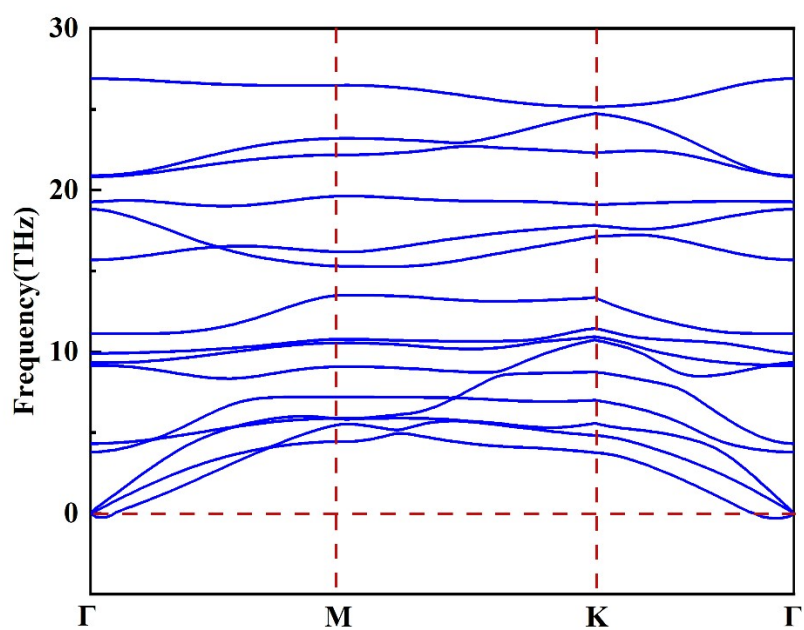

**Fig. S1.** The phonon dispersion of  $B_3S_2$  monolayer using a  $(2 \times 2 \times 1)$  cell.

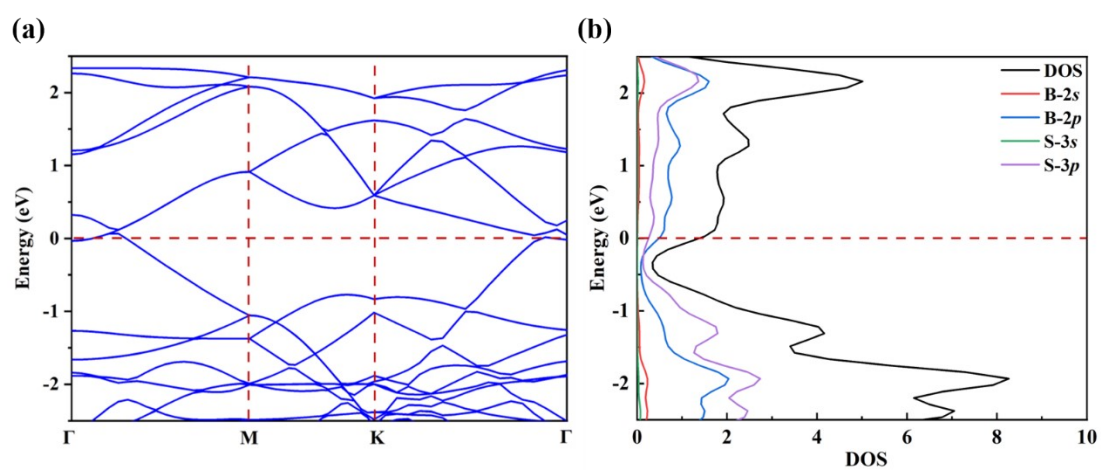

**Fig. S2.** (a) Electronic band structure and (b) DOS of  $B_3S_2$  monolayer using a  $(2 \times 2 \times 1)$  cell.

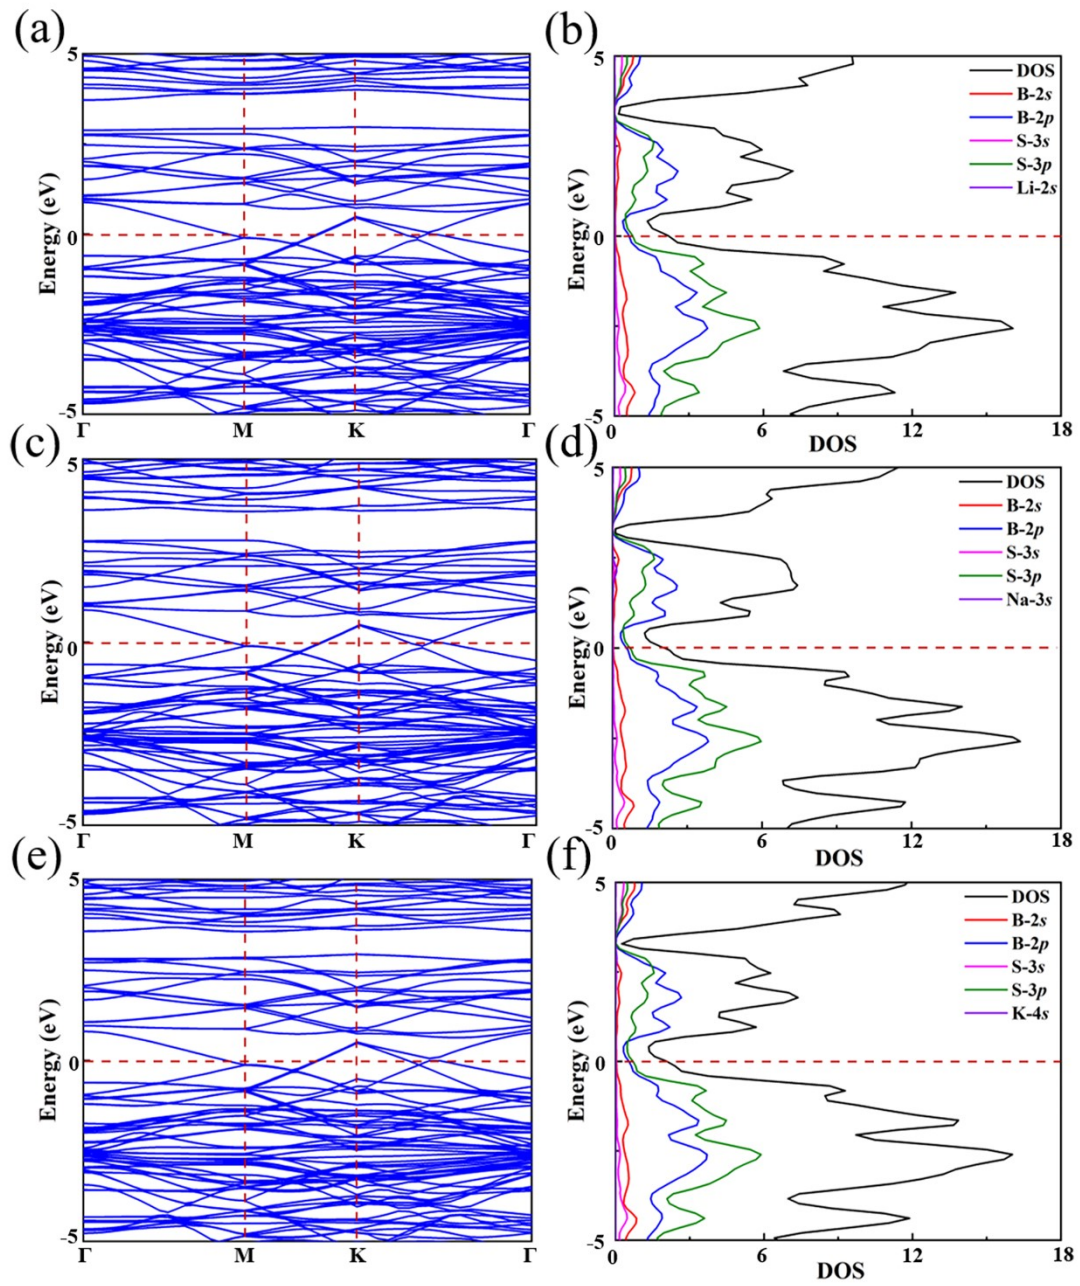

**Fig. S3.** Electronic band structures and DOSs of  $B_3S_2$  monolayer after the adsorption of Li, Na, and K atoms.

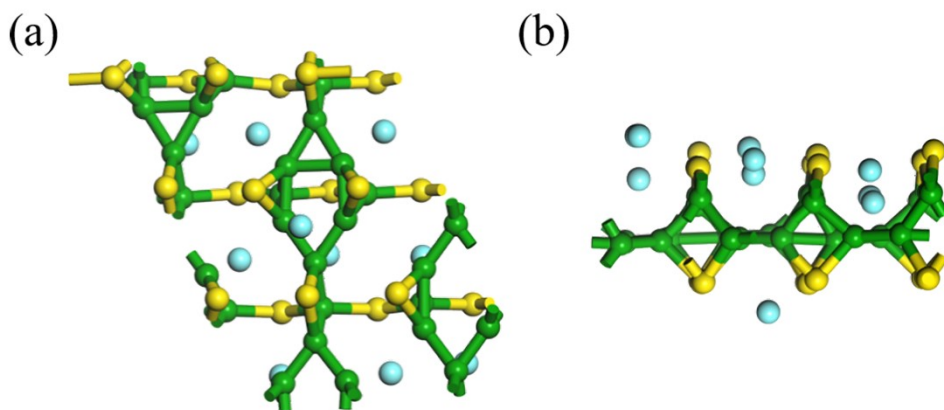

**Fig. S4.** Top and side views of geometric structures for Li adsorption on the  $B_3S_2$  monolayer.

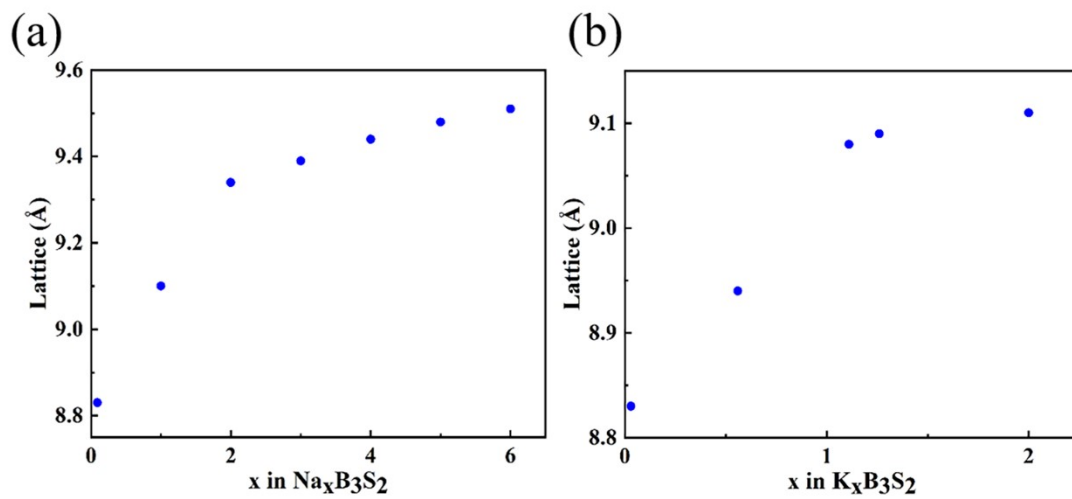

**Fig. S5.** The lattice constant variation as the function of Na and K concentration  $x$ : (a)  $Na_xB_3S_2$ , (b)  $K_xB_3S_2$ .

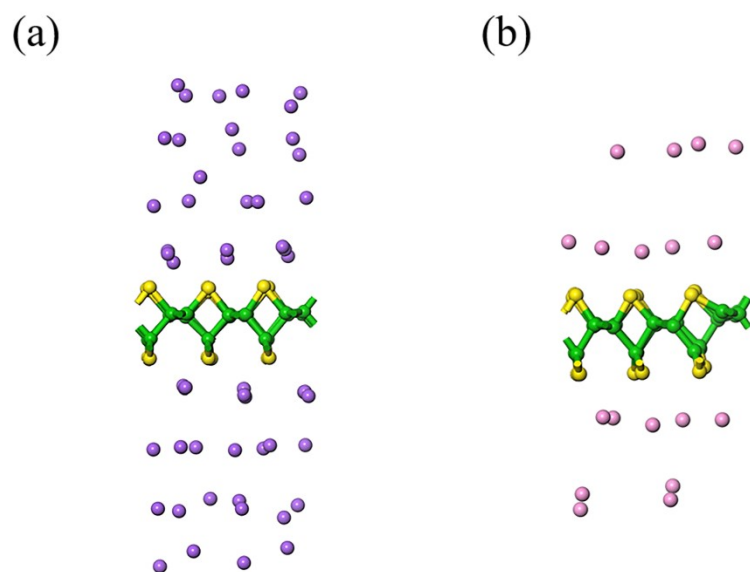

**Fig. S6.** Snapshots of (a) Na<sub>6</sub>B<sub>3</sub>S<sub>2</sub> and (b) K<sub>2</sub>B<sub>3</sub>S<sub>2</sub> equilibrium structures at 300 K at the end of 2 ps AIMD simulations.
